# Supplementary material for: Multivariate Relationships among Carcass Traits and Proximate Composition, Lipid Profile, and Mineral Content of Longissimus lumborum of Grass-Fed Male Cattle Produced under Tropical Conditions
Source: MDPI journal article supplement (doi:10.3390/foods10061364), 2021-06-12
Supplement: s1 [file s1]

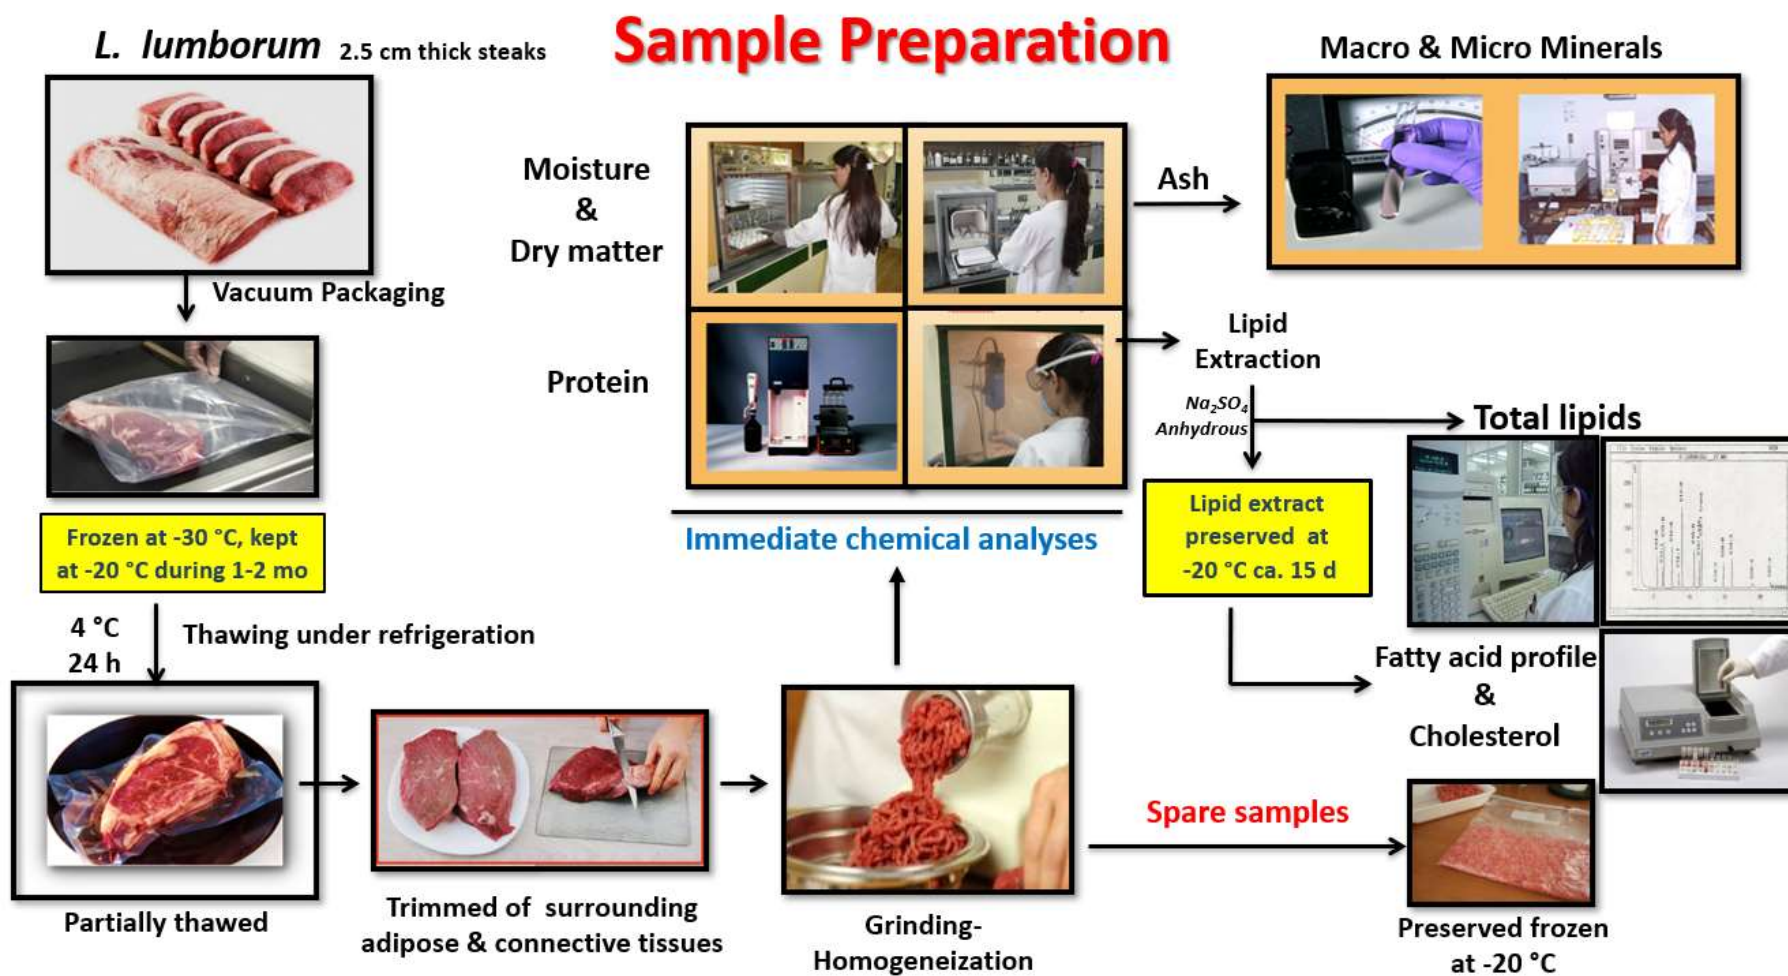

Figure S1. Graphical description of sample preparation and chemical analyses

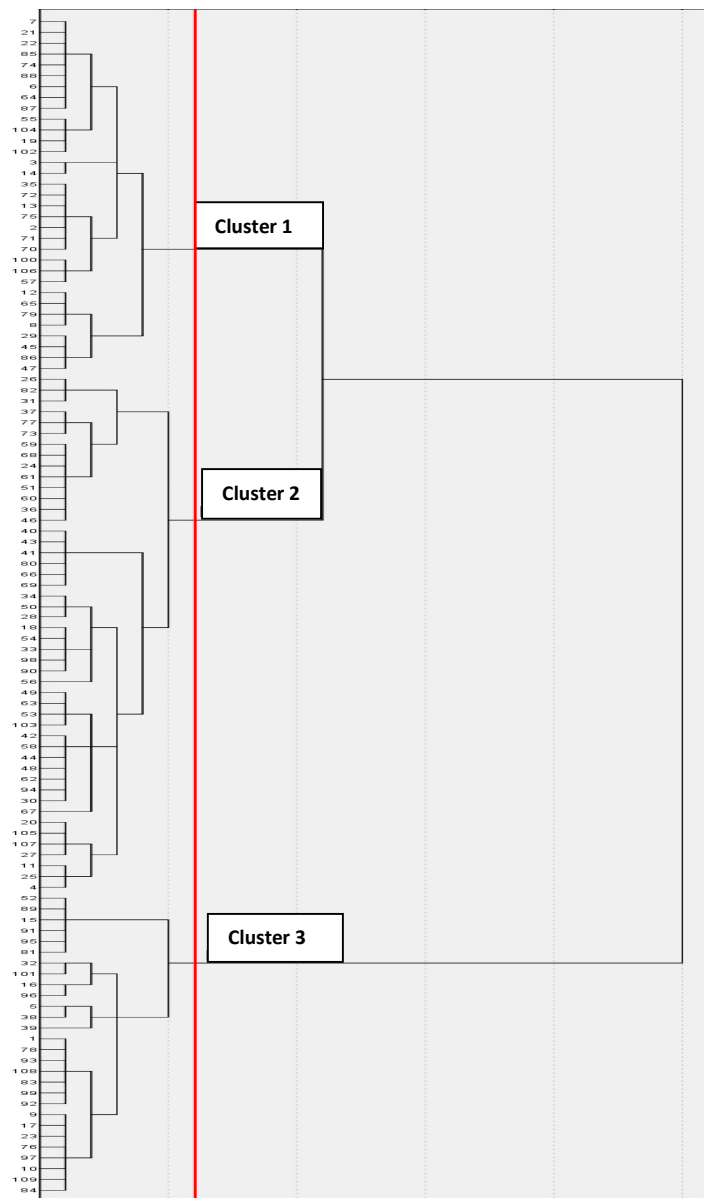

**Figure S2.** Dendrogram for samples from the hierarchical cluster analysis identifying clusters. The samples were numbered randomly from 1 to 109.

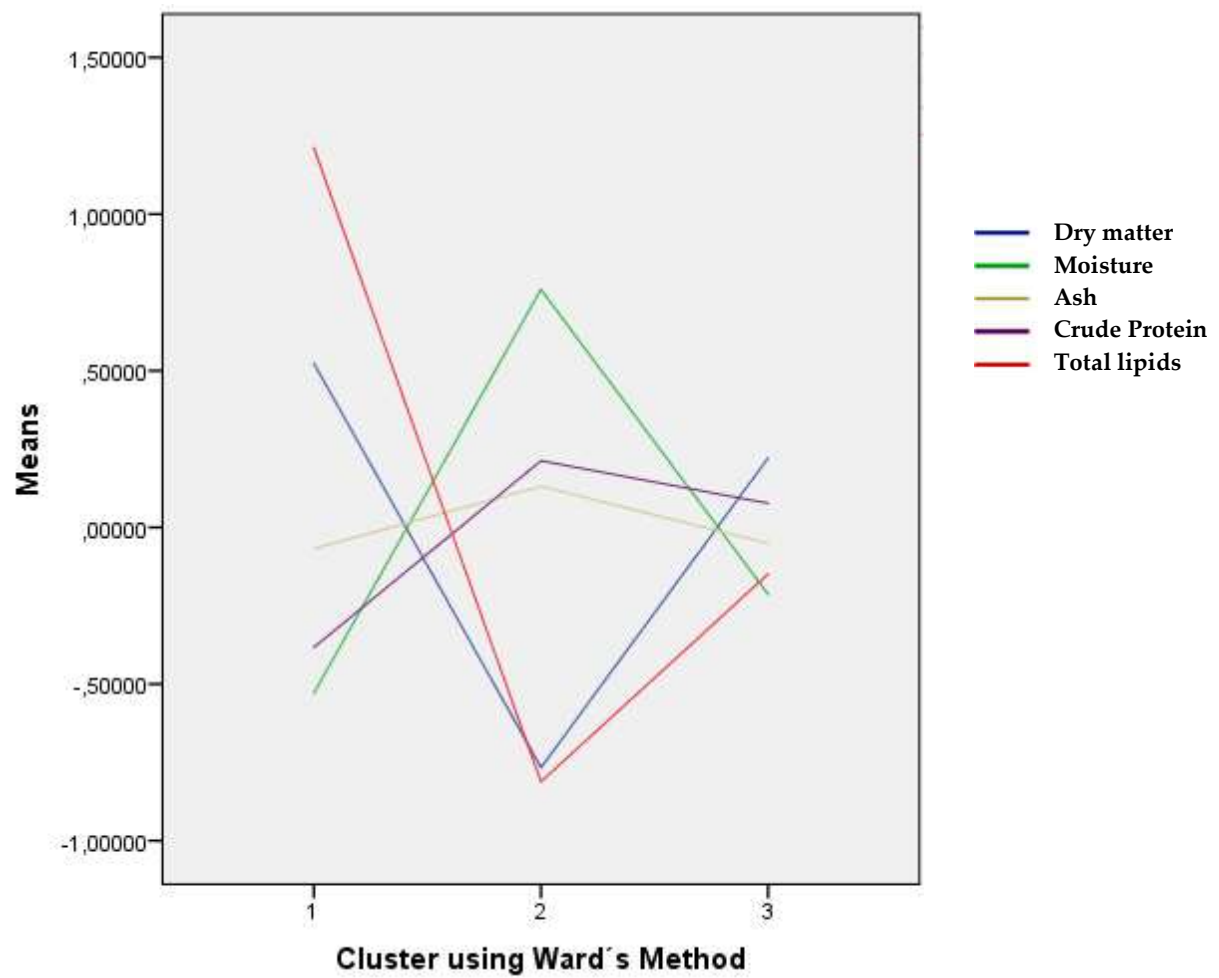

**Figure S3.** Projection of variables from the subgroup proximate composition by clusters

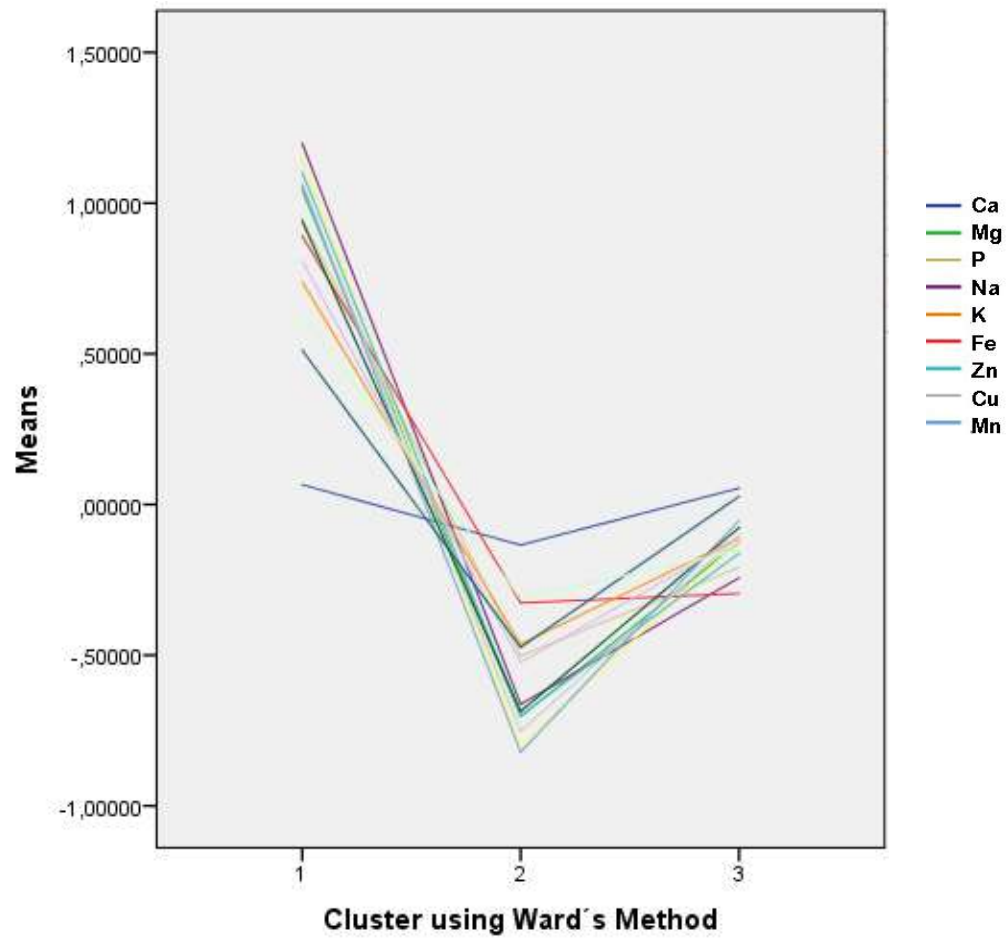

**Figure S4.** Projection of variables from the subgroup mineral content by clusters

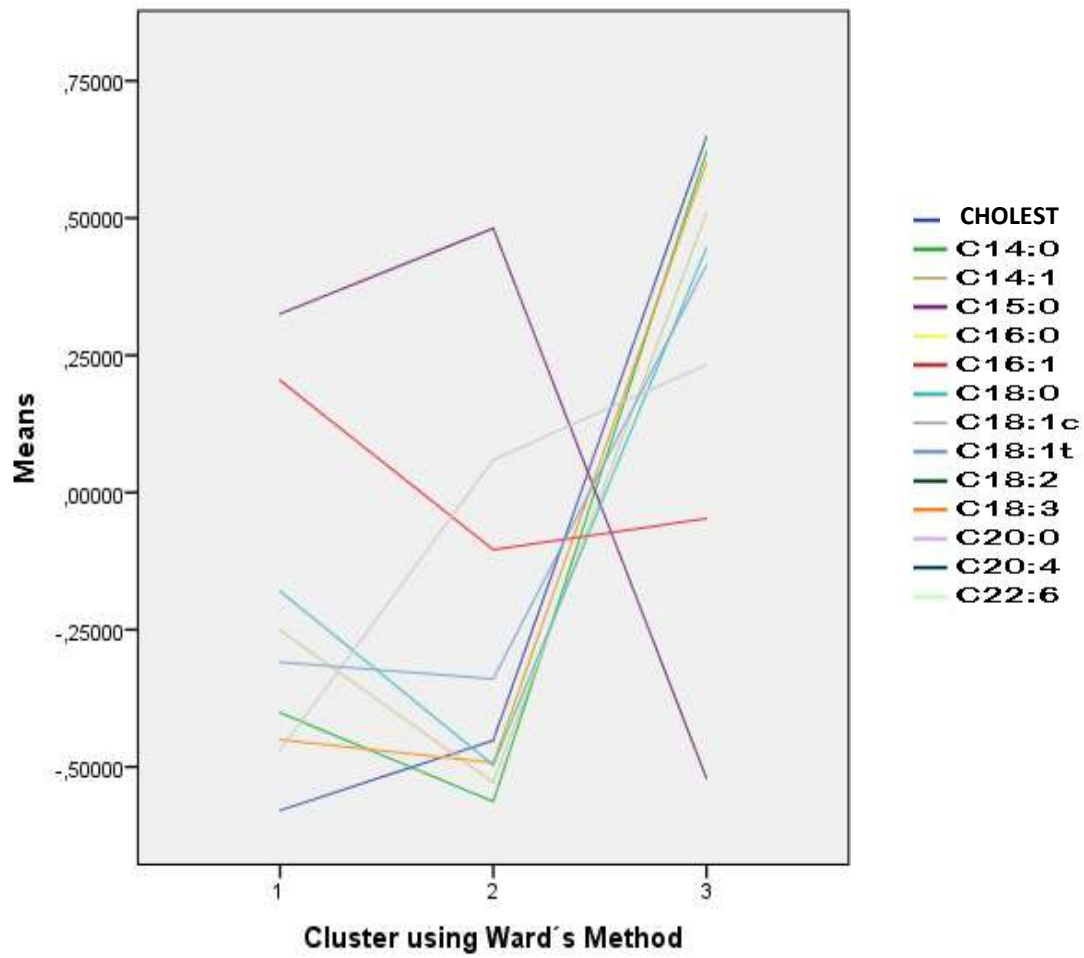

**Figure S5.** Projection of variables from the subgroup lipid profile by clusters

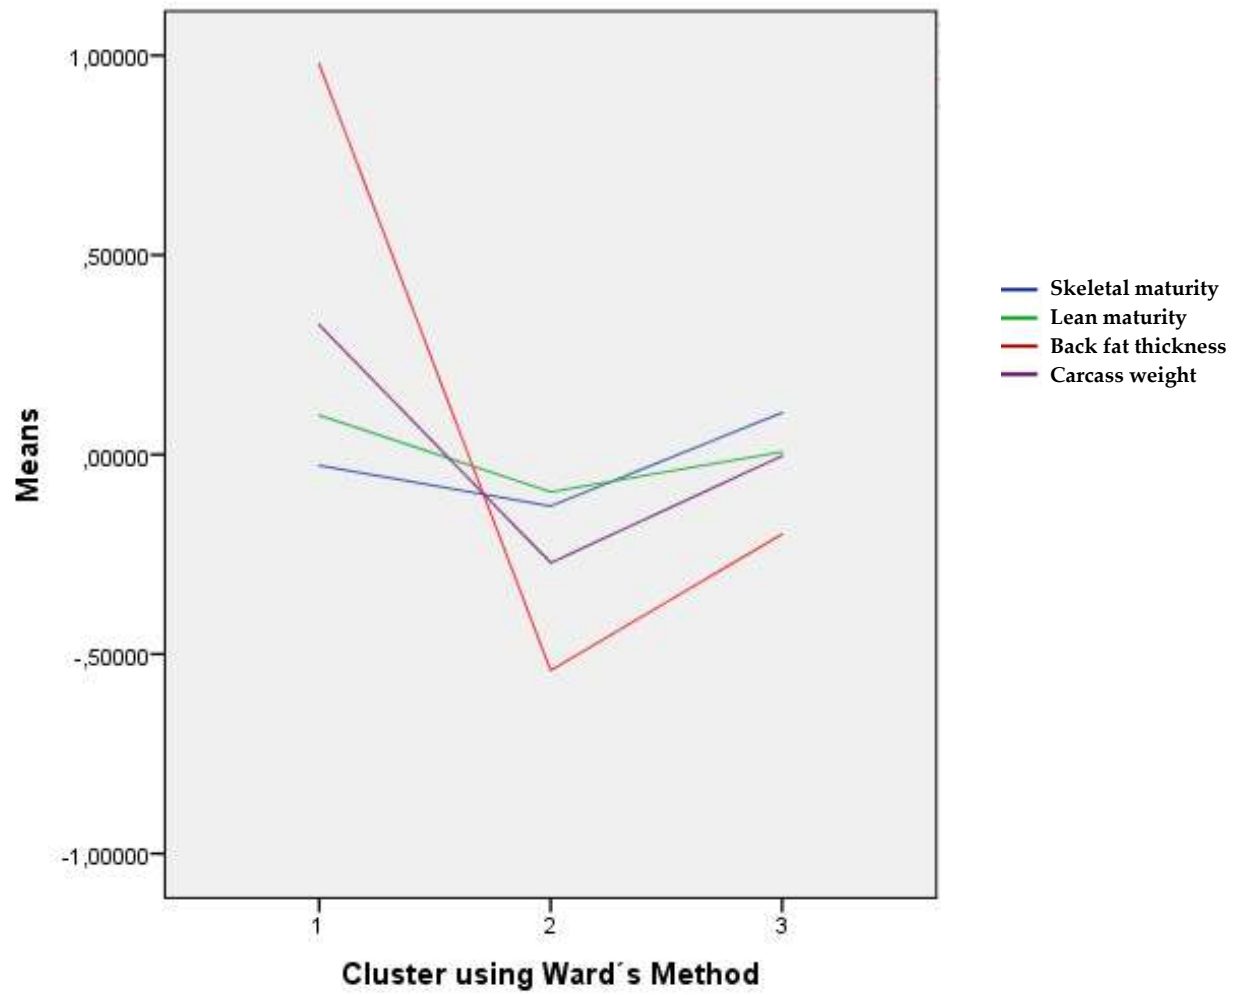

**Figure S6.** Projection of variables from the subgroup carcass traits by clusters
